# Supplementary material for: Solvent-controlled ion-coupled charge transport in microporous metal chalcogenides
Source: PubMed Central journal article supplement — Chem Sci. 2022 Oct 24;13(43):12747–59. doi: 10.1039/d2sc05090k (PMC9645383; doi:10.1039/d2sc05090k), 2022-10-24
Supplement: SC-013-D2SC05090K-s001.pdf [file SC-013-D2SC05090K-s001.pdf]

*Supporting Information for*

# **Solvent-Controlled Ion-Coupled Charge Transport in Microporous Metal Chalcogenides**

Jacob McKenzie, Paul A. Kempler, and Carl K. Brozek\*

*Department of Chemistry and Biochemistry,  
Materials Science Institute, Oregon Center for Electrochemistry*

*University of Oregon, Eugene, OR 97403*

Email: [cbrozek@uoregon.edu](mailto:cbrozek@uoregon.edu)

## **Table of Contents**

|                                                    |     |
|----------------------------------------------------|-----|
| <b>Experimental methods</b> .....                  | S2  |
| <b>Synthetic Procedures</b> .....                  | S4  |
| <b>DC Electrochemical Analysis</b> .....           | S5  |
| <b>Electrochemical Impedance Analysis</b> .....    | S10 |
| <b>Temperature Dependent DC Conductivity</b> ..... | S17 |
| <b>References</b> .....                            | S19 |

## Experimental Methods

*Materials.* All commercial chemicals were used as received unless stated otherwise. Germanium powder (99.99%, Sigma Aldrich), sublimed sulfur powder (99%, Strem), tetramethylammonium hydroxide pentahydrate (95%, Oakwood Chemical), iron(II) chloride (anhydrous, Strem), zinc(II) nitrate hexahydrate (98%, Sigma Aldrich), hexanes (98.5%, Fisher Chemical), toluene (99.5%, Fisher Chemical), chloroform (99.9%, Fisher Chemical), tetrahydrofuran (99.9%, Oakwood Chemical), dichloromethane (99.5%, Fisher Chemical), *tert*-butanol (99%, J.T. Baker), 2-propanol (99%, Fisher Scientific), *n*-propanol (Macron Chemicals, 99%), acetone ( $\geq 99.5\%$ , Fisher Chemical), ethanol ((200 proof, Decon Labs), methanol (99.8%, Fisher Chemical), formamide (Fisher Chemical, 99.5%), 1,2-dichlorobenzene ( $\geq 99\%$ , Fisher Scientific) and nanopure water (Thermo Scientific, Barnstead Nanopure). Solvothermal syntheses were conducted in autoclave PAAR bombs in Yamato Convection oven unless stated otherwise.

*Characterization.* Sample purity and crystallinity was verified by powder X-ray diffraction (PXRD) with a Bruker D2 Phaser benchtop diffractometer.

*Dry Pressed pellet conductivity measurements.* Pressed pellets were prepared by compressing powders in a modified KBr pellet press die set with a hydraulic press at 500 psi for 30 minutes. The pellet press die set was modified with tinned copper wires affixed to both sides with silver paint and epoxy. Electrical contacts were made by pressing a pellet with the modified die set comprised of stainless-steel circular ends serving as two electrode contacts. Direct-current (DC) conductivities were determined from the slopes of current-voltage ( $I$ - $V$ ) curves collected with a GAMRY Instruments Interface 5000E potentiostat, along with the electrode area ( $0.402 \text{ cm}^2$ ) and pellet thickness, according to the equation below (where  $C$  is the slope of the most linear portion of the  $I$ - $V$  curve and  $m$  is the pellet thickness):

$$DC_{\sigma} = \frac{C * m}{0.402}$$

The associated error for conductivity measurements was found by compounding errors from both the pellet dimensions ( $m$  and the electrode area) and the linear regression analysis used to find  $C$ , using the following equation [where  $\Delta m$  is the error associated with the pellet thickness ( $0.002 \text{ cm}$ , from the precision of the digital calipers utilized)  $\Delta a$  is the error associated with the electrode area ( $0.0045 \text{ cm}^2$ ) and  $\Delta C$  is the error associated with the linear regression performed to obtain the slope:

$$\Delta DC_{\sigma} = DC_{\sigma} \left( \frac{\Delta m}{m} + \frac{\Delta a}{0.402} + \frac{\Delta C}{C} \right)$$

Unless specified otherwise, samples were swept voltammetrically at  $2 \text{ mV/s}$  between  $-0.2/(-0.1)$  and  $0.1 \text{ V}$  vs OCP compressed by a C-clamp. Temperature-dependent measurements were conducted in a similar fashion with samples kept at fixed temperatures in a Yamato Convection oven.

*Pressed pellet conductivity measurements after solvent addition.* Pressed pellets were prepared as described above. To the prepared pellets  $10 \mu\text{L}$  of a solvent were added and the OCP was monitored to determine stability. Direct-current (DC) conductivities were determined from the

slopes of the most linear portion of the current-voltage (I-V) curves collected with a GAMRY Instruments Interface 5000E potentiostat, along with the electrode area ( $0.402 \text{ cm}^2$ ) and pellet thickness, according to the equation above. Temperature dependent measurements were conducted in a similar fashion with samples kept at fixed temperatures in a Yamato Convection oven.

*Dry pressed pellet EIS measurements.* Using a setup identical to the pressed pellet conductivity measurements, AC measurements were run with a DC voltage of 0 V vs. OCP with an AC amplitude of 50 mV and 300 mV for  $\text{TMA}_2\text{FeGe}_4\text{S}_{10}$  and  $\text{TMA}_2\text{ZnGe}_4\text{S}_{10}$  respectively, from 2 MHz to 0.1 Hz.

*Solvent dependent pressed pellet EIS measurements ( $\text{TMA}_2\text{FeGe}_4\text{S}_{10}$ ).* Using a setup identical to the pressed pellet conductivity measurements, AC measurements were run with a DC voltage of 0 V vs. OCP from 2 MHz to 0.1 (0.01) Hz after the addition of 10  $\mu\text{L}$  of a solvent. An AC voltage of 50 mV was employed for  $\text{CH}_2\text{Cl}_2$ , IPA, *n*-propanol, and EtOH; and 10 mV was the AC voltage for MeOH and deionized water. OCP was allowed to stabilize before beginning measurements.

*Solvent dependent pressed pellet EIS measurements ( $\text{TMA}_2\text{ZnGe}_4\text{S}_{10}$ ).* Using a setup identical to the pressed pellet conductivity measurements, AC measurements were run with a DC voltage of 0 V vs. OCP from 2 MHz to 0.1 Hz after the addition of 10  $\mu\text{L}$  of a solvent. An AC voltage of 50 mV was employed for  $\text{CH}_2\text{Cl}_2$ , IPA, *n*-propanol, EtOH, MeOH and deionized water. OCP was allowed to stabilize before beginning measurements.

## Synthetic Procedures

### Precursor Cluster Syntheses

*TMA<sub>4</sub>Ge<sub>4</sub>S<sub>10</sub>*. Following a procedure outlined in our previous report,<sup>1</sup> germanium powder (1 g, 13.76 mmol), sulfur powder (1.77 g, 6.88 mmol), and water (7.44 g, 412.8 mmol) were added to a Teflon Parr bomb. While slowly stirring this mixture with a glass rod, tetramethyl ammonium hydroxide pentahydrate (4.99 g, 27.5 mmol) was added and then the Parr bomb was sealed and placed in a fixed-temperature oven at 150 °C for 15 hours. The resulting yellow solution was vacuum filtered to remove unreacted germanium and then ~500 ml of acetone was added to induce precipitation of a white solid. The white powder was washed with acetone (20 ml × 3), hot toluene (20 ml × 3), and hexanes (20 ml × 3), then dried overnight under dynamic vacuum to afford an off-white powder. The resulting product was stored under ambient conditions.

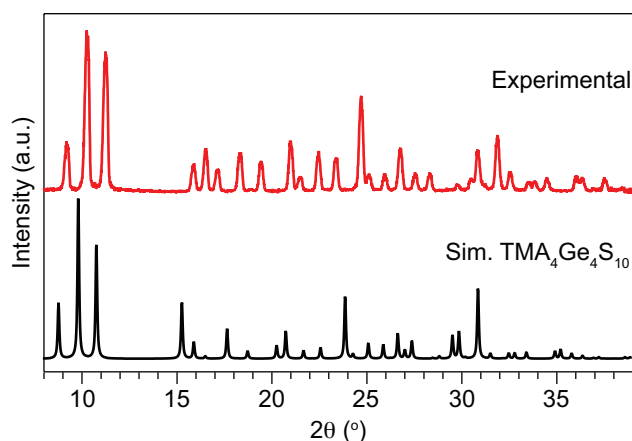

**Figure S1:** Experimental (red trace) and simulated (black trace) powder X-ray diffraction patterns of *TMA<sub>4</sub>Ge<sub>4</sub>S<sub>10</sub>*.

### TMA<sub>2</sub>MGe<sub>4</sub>S<sub>10</sub> (M = Fe, Zn) Syntheses

All procedures were followed as outlined in our previous report.<sup>1</sup>

*TMA<sub>2</sub>FeGe<sub>4</sub>S<sub>10</sub>*: Anhydrous iron(II) chloride (0.050 g, 0.40 mmol) and *TMA<sub>4</sub>Ge<sub>4</sub>S<sub>10</sub>* (0.18 g, 0.20 mmol) were dissolved in 4 ml and 8 ml of N<sub>2</sub>-sparged DI water, respectively under positive nitrogen atmosphere. The iron solution was added dropwise to the *TMA<sub>4</sub>Ge<sub>4</sub>S<sub>10</sub>* solution over the course of ~2 minutes. The solution was allowed to react at room temperature for ~12 hours. The bright-orange solid was washed with sparged DI water (15 ml × 2), ethanol (15 ml × 2), and hexanes (15 ml × 2) sequentially. Then, the solid was dried with a stream of nitrogen and stored under positive N<sub>2</sub> atmosphere.

*TMA<sub>2</sub>ZnGe<sub>4</sub>S<sub>10</sub>*. Zinc(II) nitrate hexahydrate (0.12 g, 0.40 mmol) and *TMA<sub>4</sub>Ge<sub>4</sub>S<sub>10</sub>* (0.18 g, 0.20 mmol) were dissolved in 4 and 8 ml of DI water, respectively. The zinc solution was added dropwise to the *TMA<sub>4</sub>Ge<sub>4</sub>S<sub>10</sub>* solution over the course of ~2 minutes. The resulting solution was left to react at room temperature for ~12 hours. The white solid was washed with DI water (15 ml × 3) and then dried in a fixed temperature oven at 150 °C for ~12 hours. The resulting material was stored under ambient conditions.

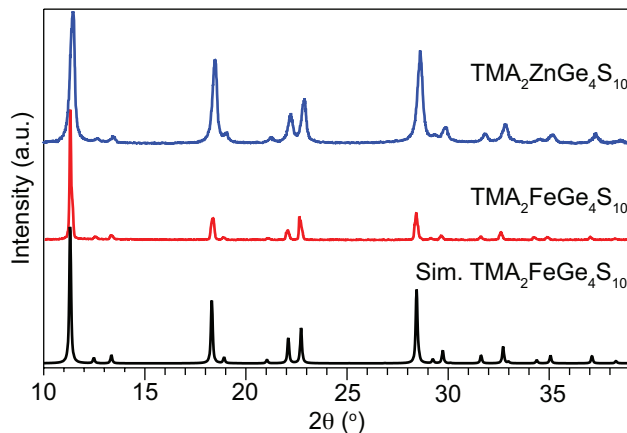

**Figure S2:** Experimental powder X-ray diffraction patterns for  $\text{TMA}_2\text{MGe}_4\text{S}_{10}$  (M: Fe and Zn) compared against a simulated pattern of  $\text{TMA}_2\text{FeGe}_4\text{S}_{10}$ .

### DC Electrochemical Analyses

Diffusion coefficients were obtained by plotting the current from chronoamperometry experiments vs. the  $\sqrt{t}$  and utilizing the equation below (where  $n$  is number of electrons (1),  $F$  is Faraday's constant,  $D_0$  is the diffusion coefficient,  $C_0$  is the concentration of  $\text{TMA}^+$ , and  $A$  ( $0.402 \text{ cm}^2$ ) is the area of the electrode). The concentration of  $\text{TMA}^+$  was calculated given the crystal structure for  $\text{TMA}_2\text{FeGe}_4\text{S}_{10}$ .<sup>2</sup>

$$i(t) = \frac{nFAD_0C_0}{\pi^{1/2}t^{1/2}}$$

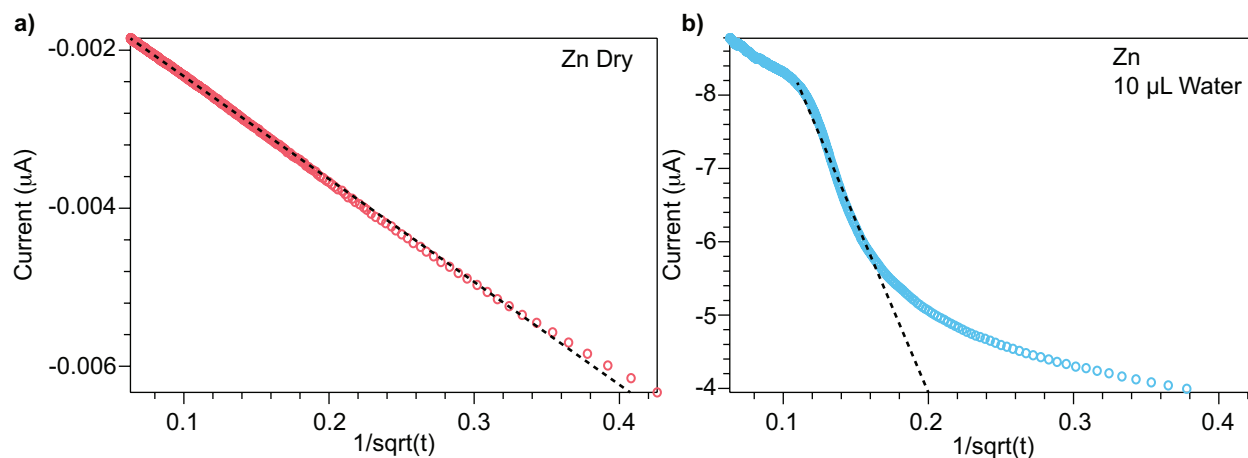

**Figure S3:** Cottrell plots for the current transients obtained at  $-0.2\text{V}$  of a pressed pellet of  $\text{TMA}_2\text{ZnGe}_4\text{S}_{10}$  before (a) and after (b) the addition of  $10 \mu\text{L}$  of deionized water. The dotted trace fits are used to obtain diffusion coefficients.

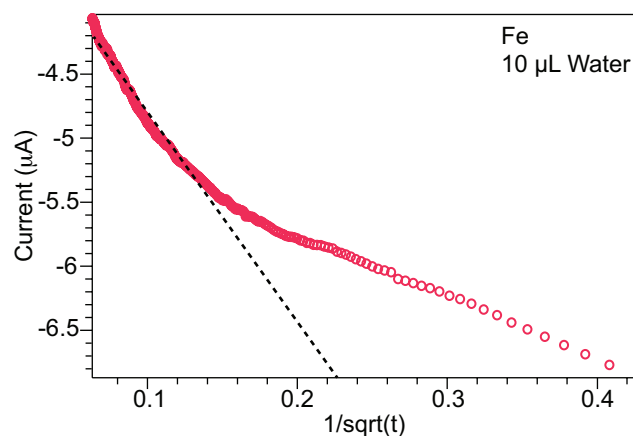

**Figure S5:** Cottrell plots for the current transients obtained at  $-0.2\text{V}$  for a pressed pellet of  $\text{TMA}_2\text{FeGe}_4\text{S}_{10}$  after addition of  $10\ \mu\text{L}$  of deionized water. The dotted trace fits are used to obtain diffusion coefficients.

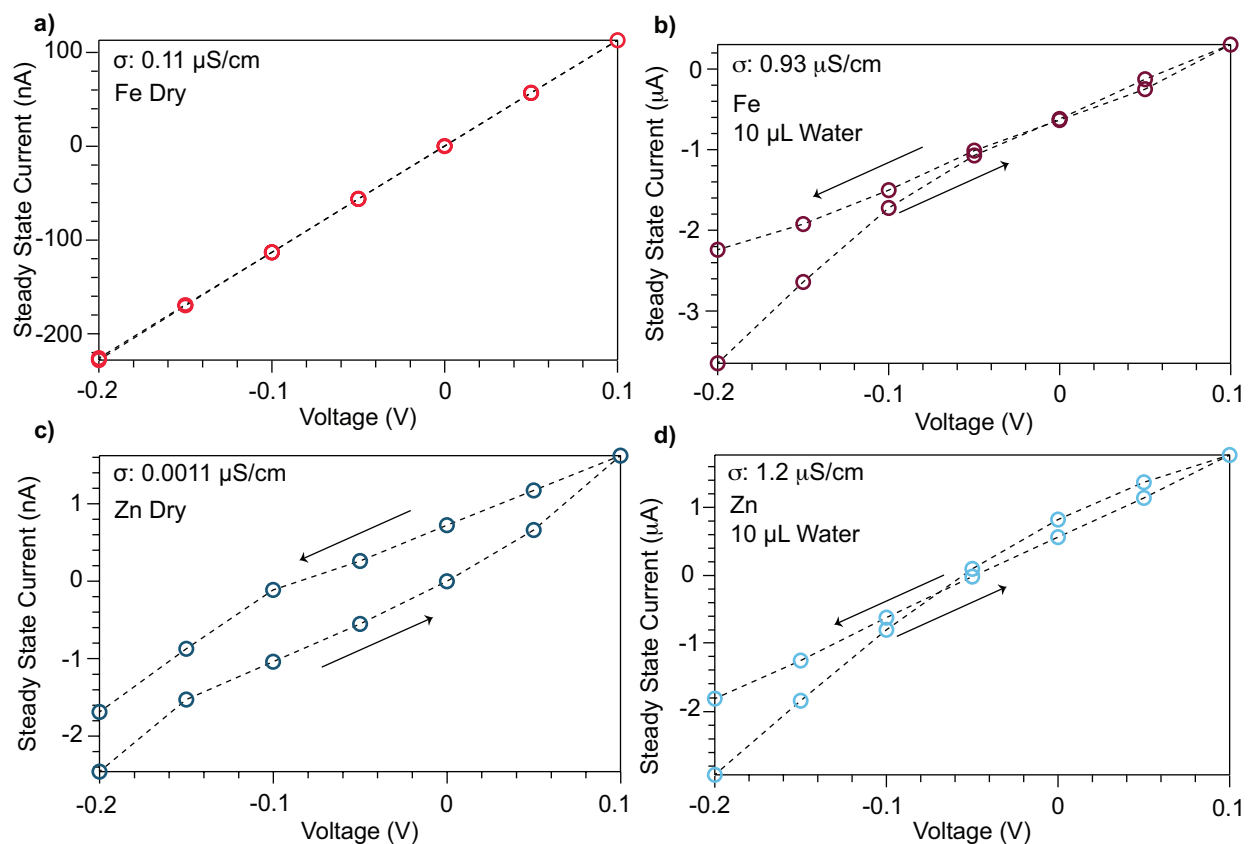

**Figure S4:** Steady-state current values vs. applied potential derived from chronoamperometry experiments for pressed pellets of  $\text{TMA}_2\text{FeGe}_4\text{S}_{10}$  before (a) and after (b) the addition of  $10\ \mu\text{L}$  of deionized water and pressed pellets of  $\text{TMA}_2\text{ZnGe}_4\text{S}_{10}$  before (c) and after the addition of  $10\ \mu\text{L}$  of deionized water (d). Arrows denote the direction of potential scanned. Conductivity values are displayed and calculated from the slope of the return scan.

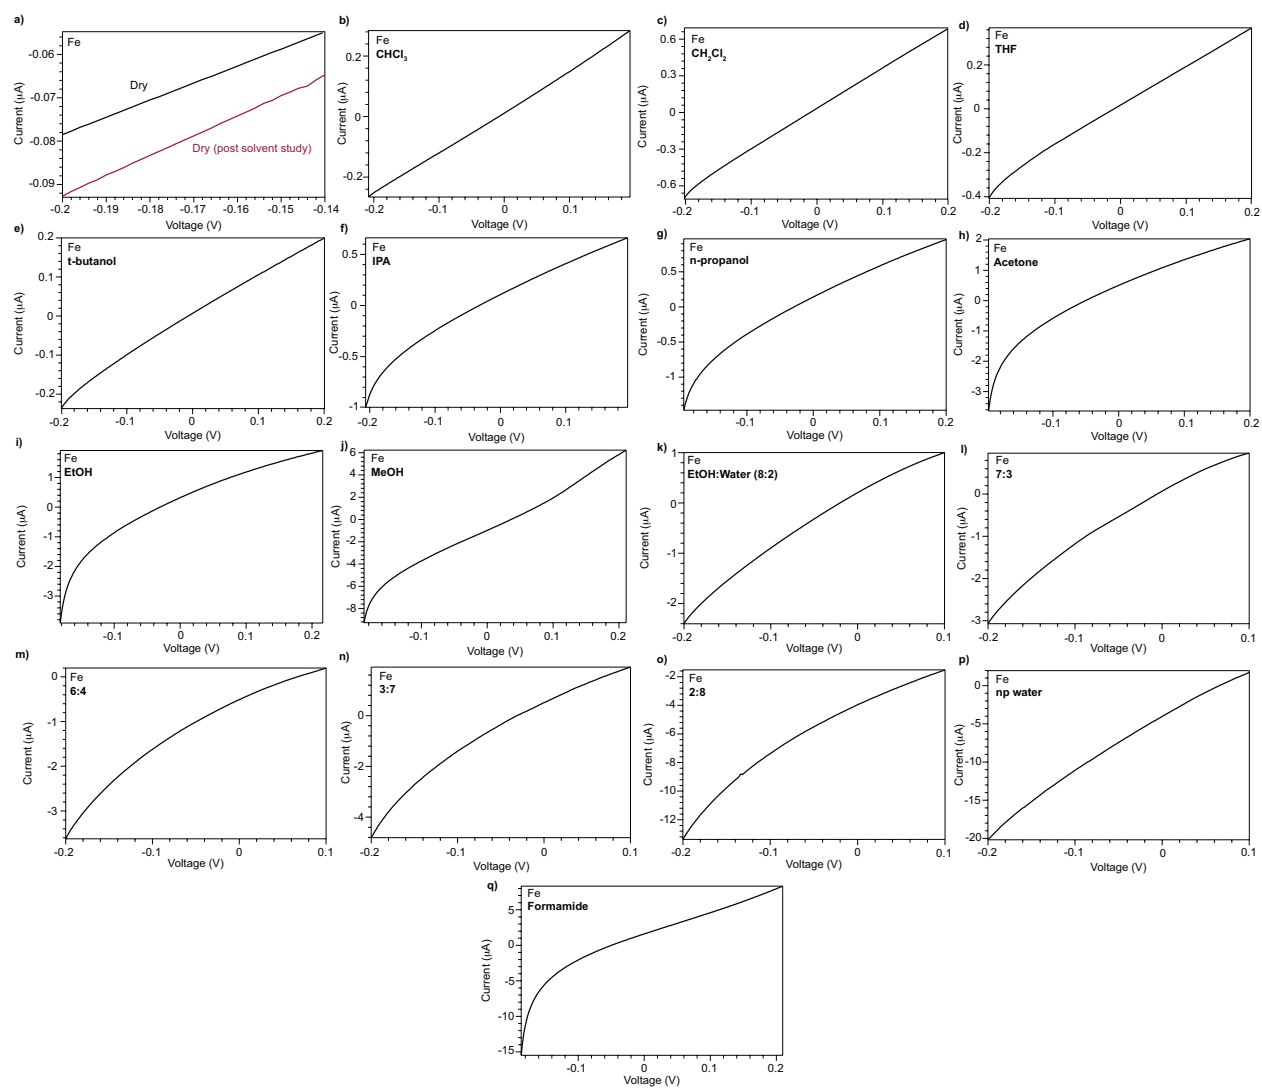

**Figure S6:**  $I$ - $V$  curves measured for pressed-pellets of  $\text{TMA}_2\text{FeGe}_4\text{S}_{10}$  scanned at  $2\text{mV/s}$  subjected to various conditions: Dry (a),  $\text{CHCl}_3$  (b),  $\text{CH}_2\text{Cl}_2$  (c), THF (d),  $t$ -butanol (e), IPA (f),  $n$ -propanol (g), acetone (h), EtOH (i), MeOH (j) EtOH:Water mixtures [8:2 (k), 7:3 (l), 6:4 (m), 3:7 (n), 2:8 (o)], deionized water (p), and formamide (q).

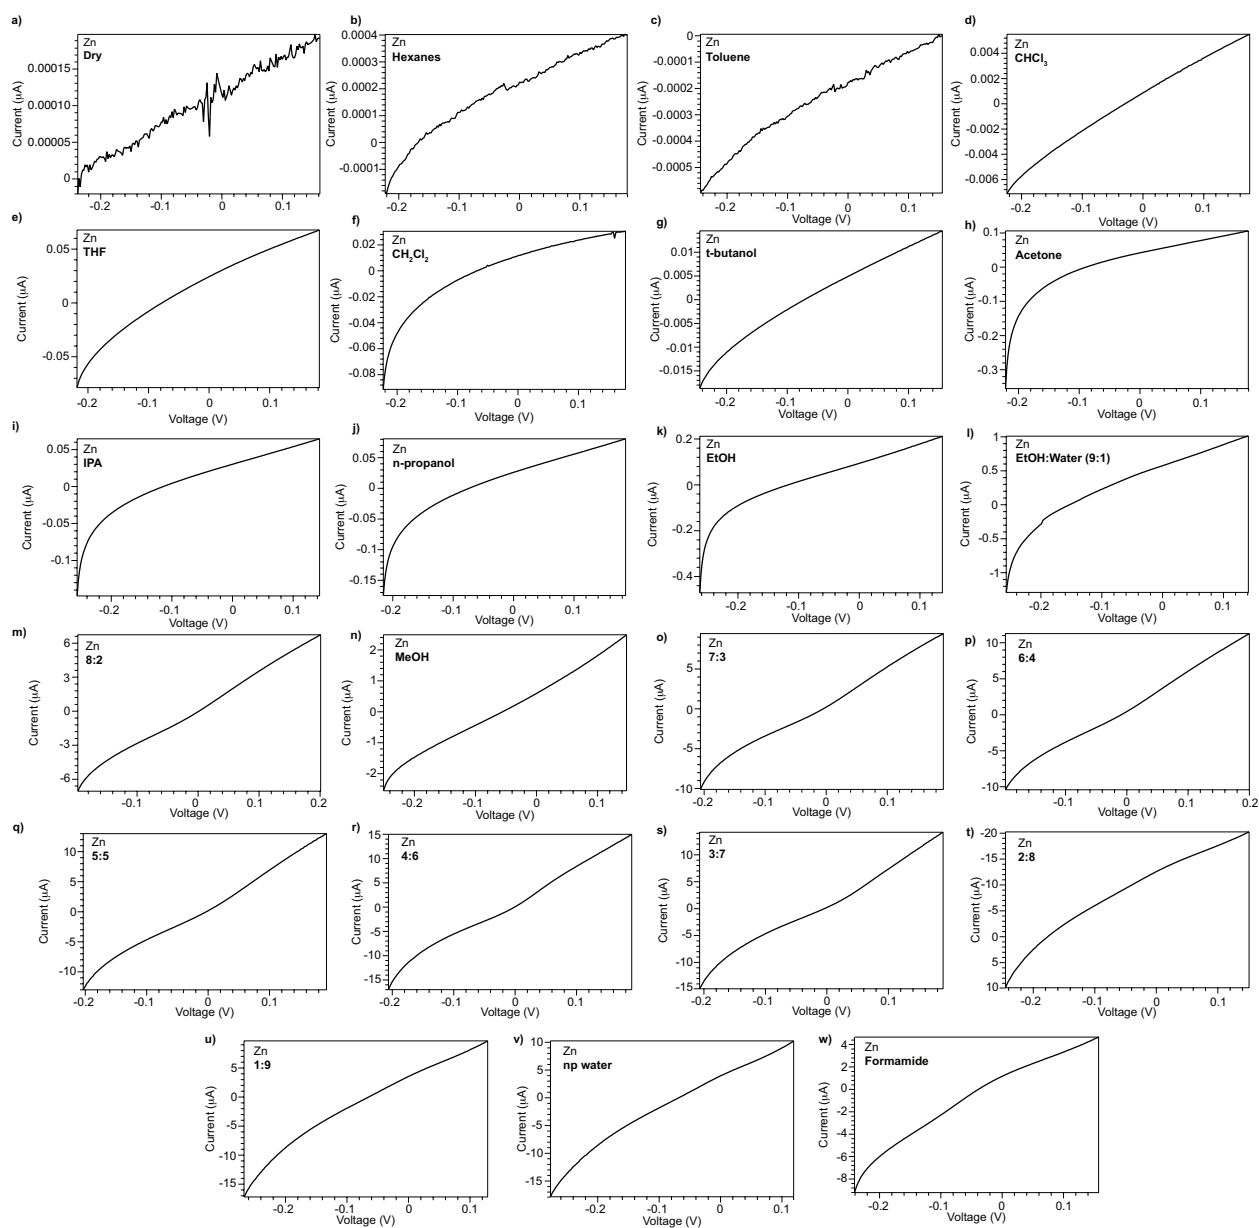

**Figure S7:**  $I$ - $V$  curves for pressed pellets of  $\text{TMA}_2\text{ZnGe}_4\text{S}_{10}$  scanned at  $2\text{mV/s}$  subjected to various conditions: Dry (a), hexanes (b), toluene (c),  $\text{CHCl}_3$  (d), THF (e),  $\text{CH}_2\text{Cl}_2$  (f), *t*-butanol (g), acetone (h), IPA (i), *n*-propanol (j), EtOH (k), MeOH (n) EtOH:Water mixtures [9:1 (l), 8:2 (m), 7:3 (o), 6:4 (p), 5:5 (q), 4:6 (r), 3:7 (s), 2:8 (t), 1:9 (u)], deionized water (v), and formamide (w).



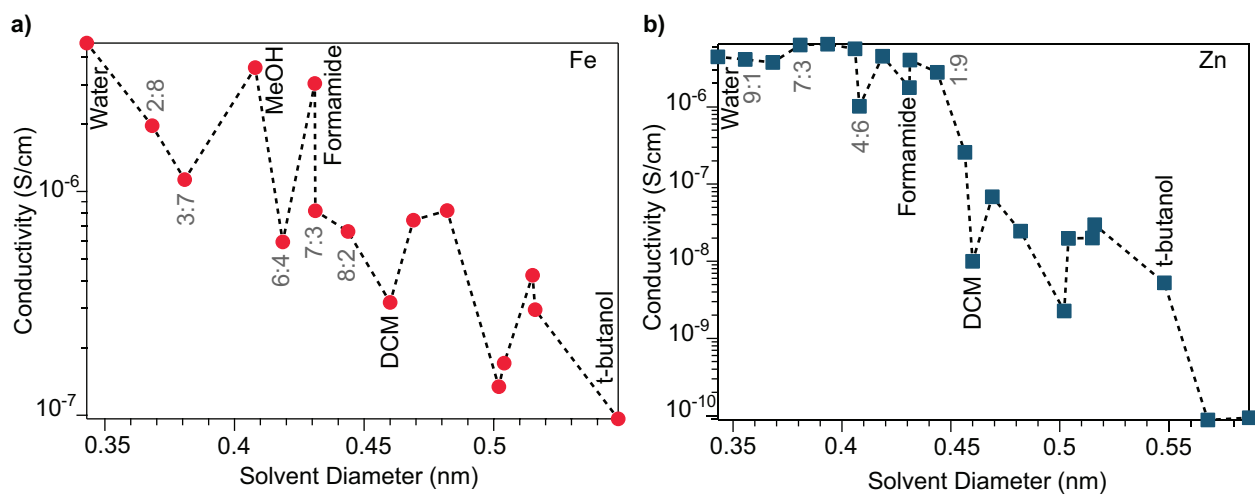

**Figure S8:** Solvent-dependent DC conductivity values of TMA<sub>2</sub>FeGe<sub>4</sub>S<sub>10</sub> (a) and TMA<sub>2</sub>ZnGe<sub>4</sub>S<sub>10</sub> (b) pressed-pellets obtained from linear fits to  $I$ - $V$  curves swept voltammetrically between  $-0.2$  V and  $0.2$  V. The conductivity values are plotted vs. solvent size

## Electrochemical Impedance Analysis

All EIS fits were performed using the open source EIS Spectrum Analyzer.<sup>3</sup> To fit an equivalent circuit, a circuit was first built given the EIS response and knowledge of the material and experimental constraints (e.g. use of ion blocking electrodes), then equivalent circuits were fit using the Powell algorithm using the amplitude function.

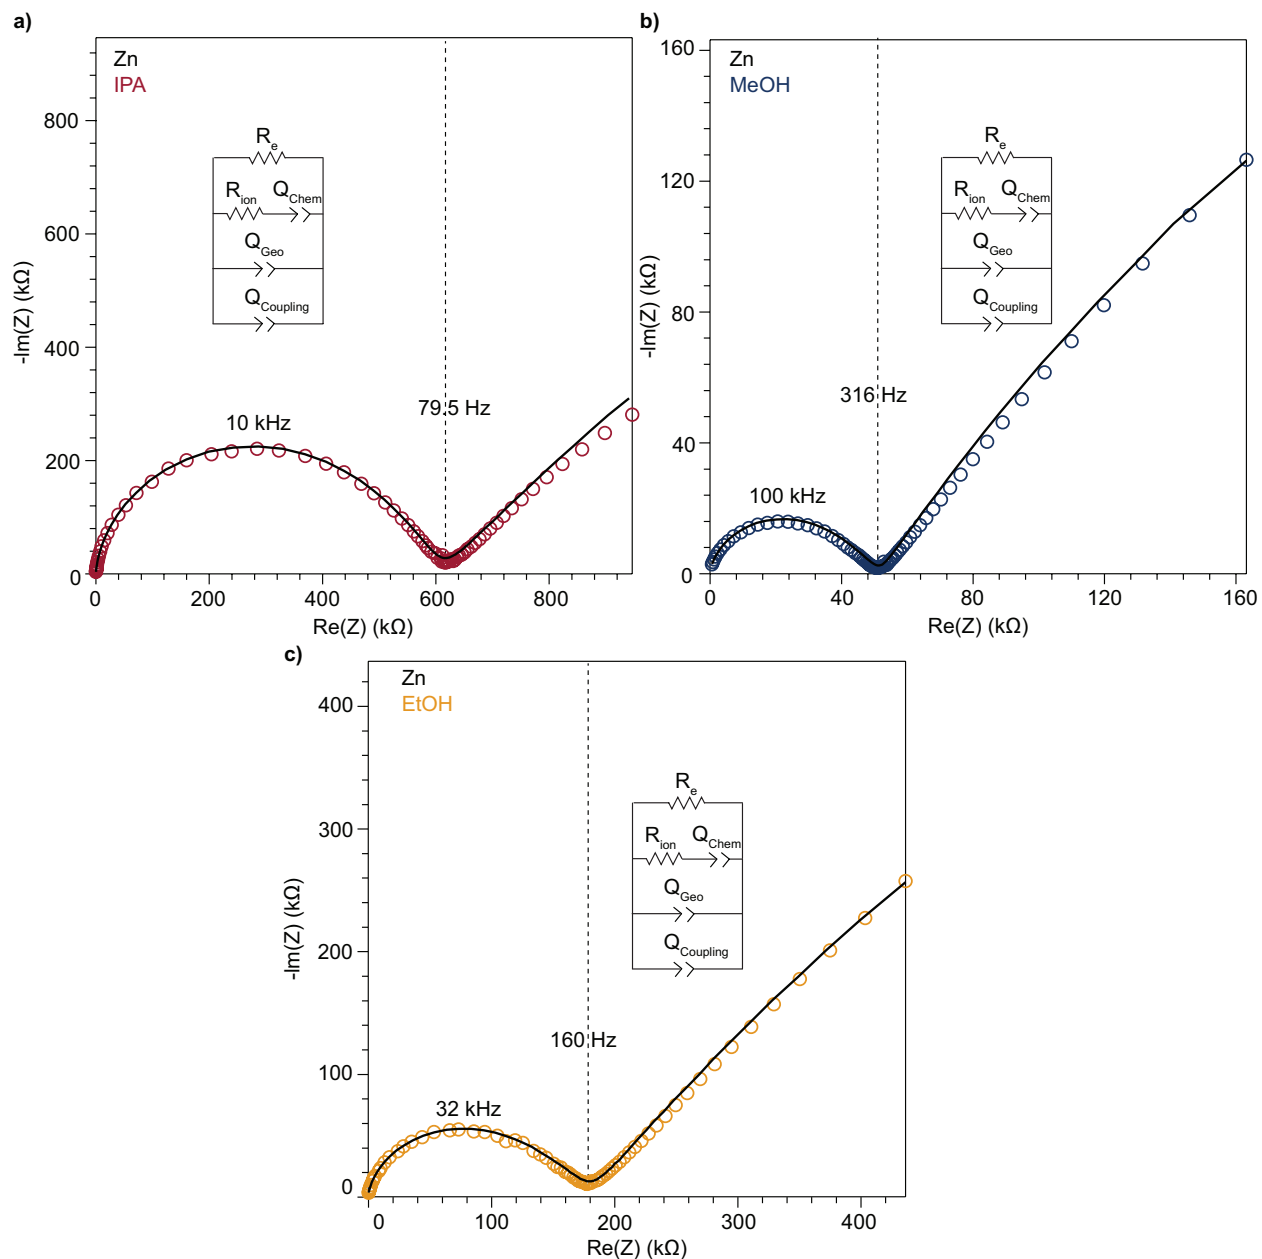

**Figure S9:** Nyquist plots of TMA<sub>2</sub>ZnGe<sub>4</sub>S<sub>10</sub> pressed-pellets after addition of IPA (a), MeOH (b), and EtOH (c). Black traces represent fits to the equivalent circuit diagrams shown in the figure

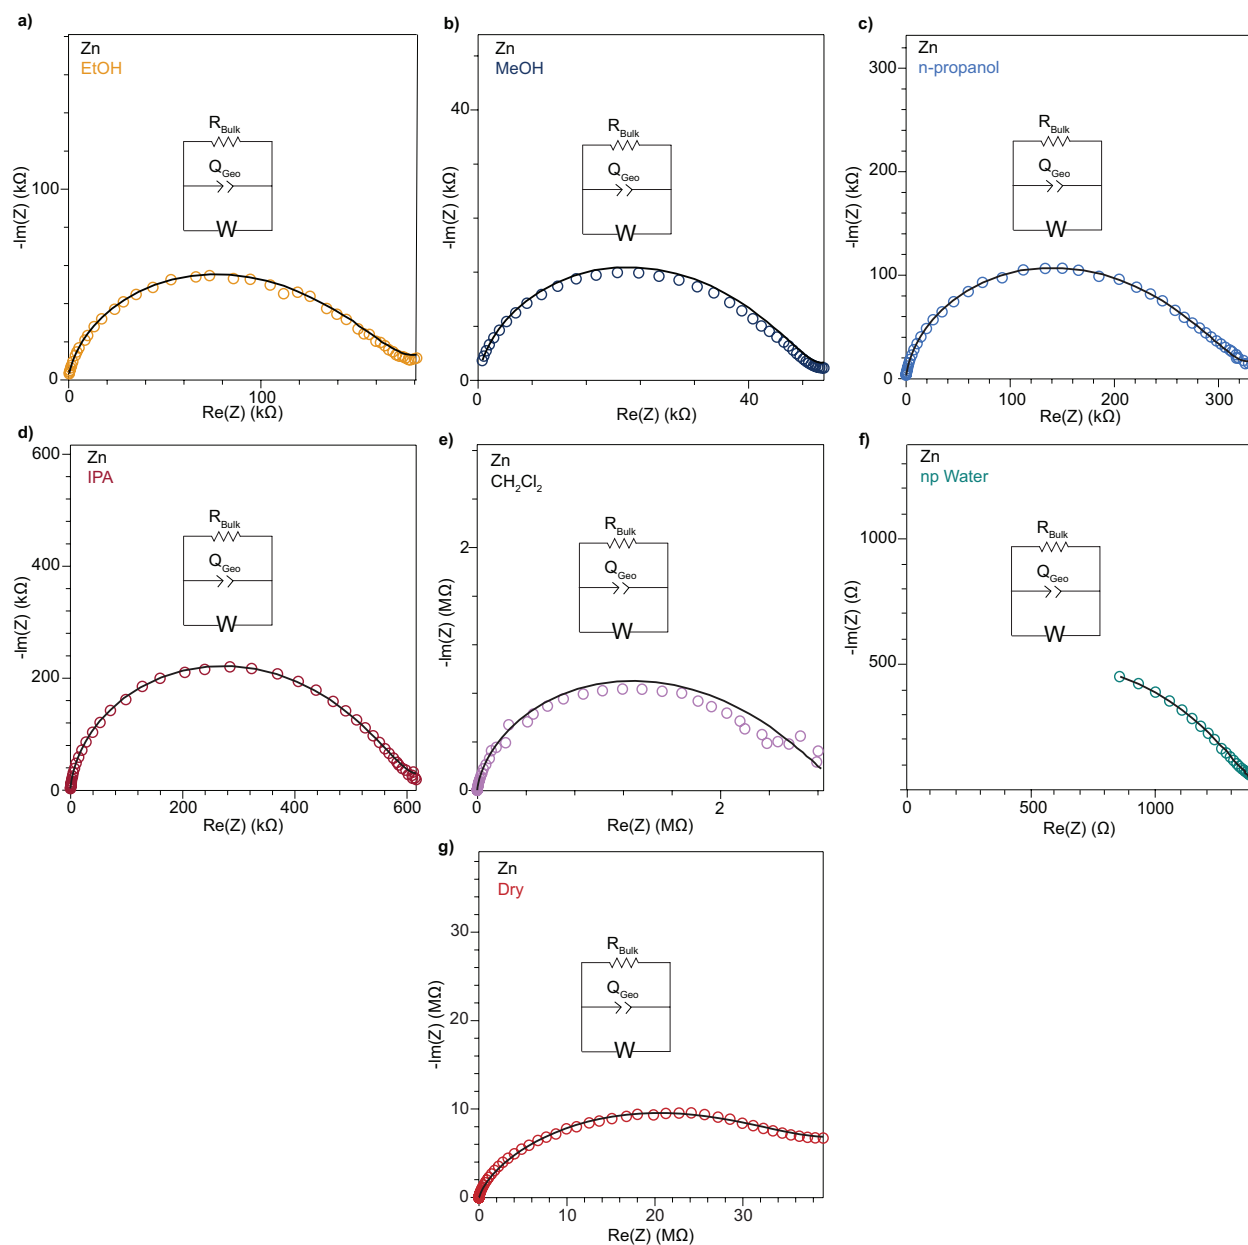

**Figure S10:** Nyquist plots of  $\text{TMA}_2\text{ZnGe}_4\text{S}_{10}$  pressed-pellets focused on the high frequency domain after addition of EtOH (a), MeOH (b), *n*-propanol (c), IPA (d),  $\text{CH}_2\text{Cl}_2$  (e), deionized water (f), and dry (g). Black traces represent fits to the displayed equivalent circuit diagrams and emphasize the effect of replacing a CPE for a Warburg element.

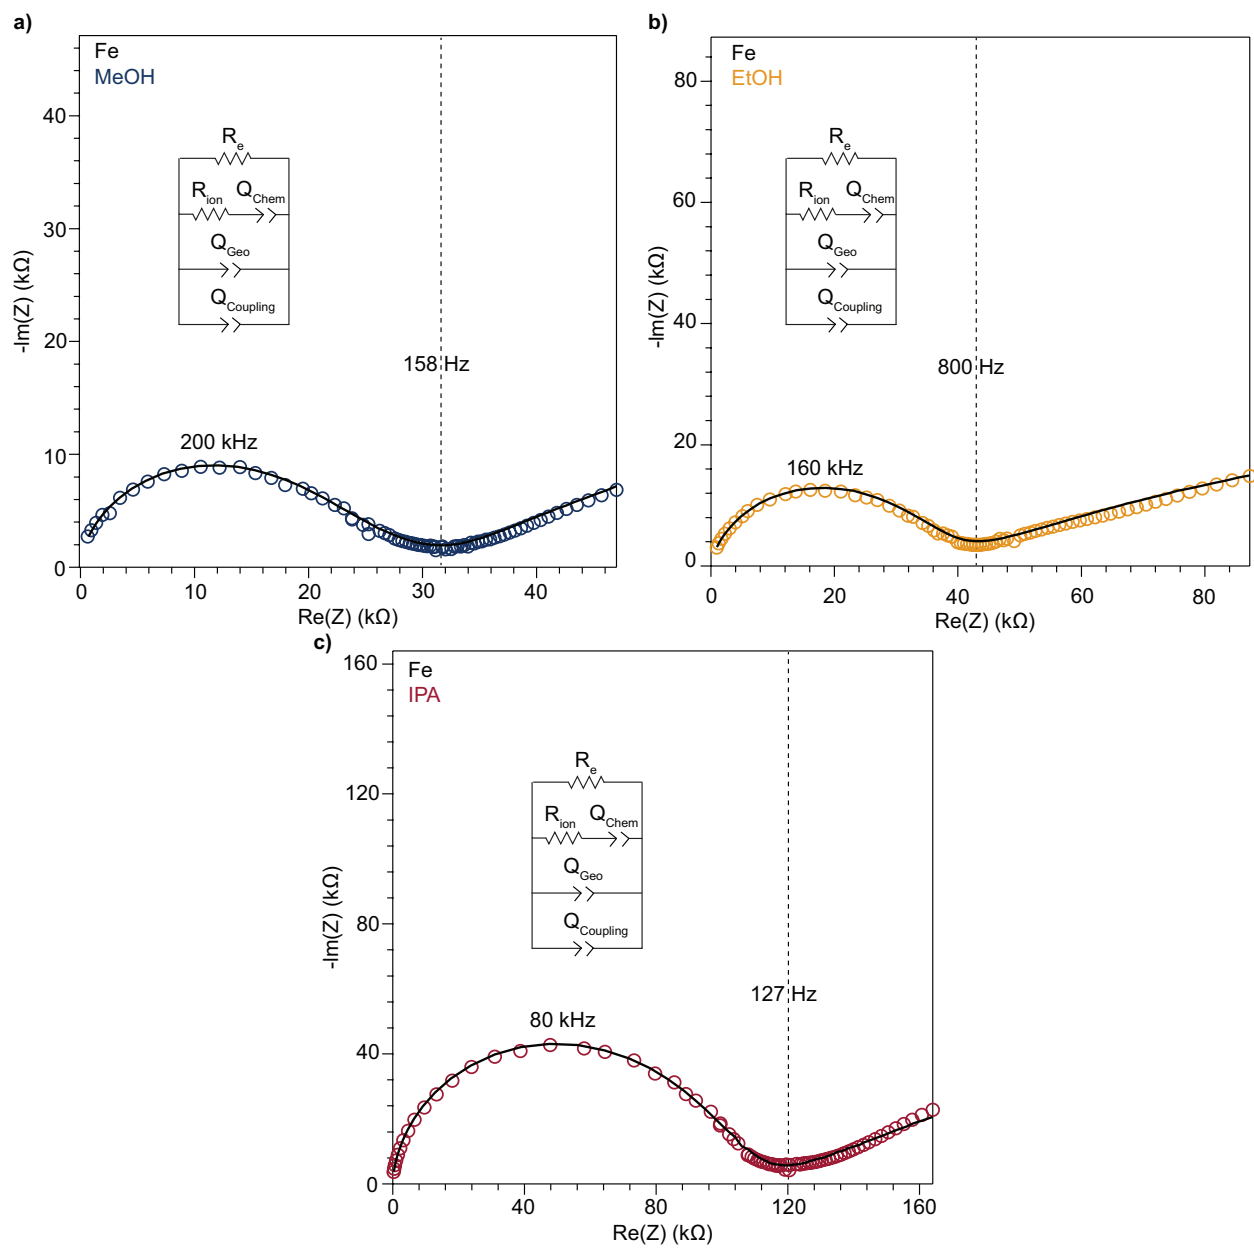

**Figure S11:** Nyquist plots of  $\text{TMA}_2\text{FeGe}_4\text{S}_{10}$  pressed-pellets after addition of MeOH (a), EtOH (b), and IPA (c). Black traces represent fits to the equivalent circuit diagrams shown in the figure.

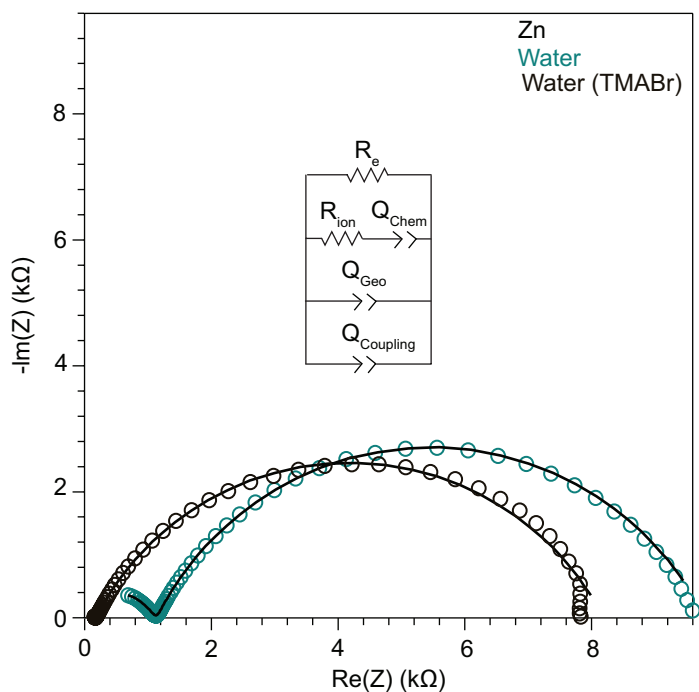

**Figure S12:** Nyquist plots of  $\text{TMA}_2\text{ZnGe}_4\text{S}_{10}$  pressed-pellets after addition of deionized water (a), and a 0.1-M TMABr aqueous solution (b). Black traces represent fits to the equivalent circuit diagram shown in the figure.

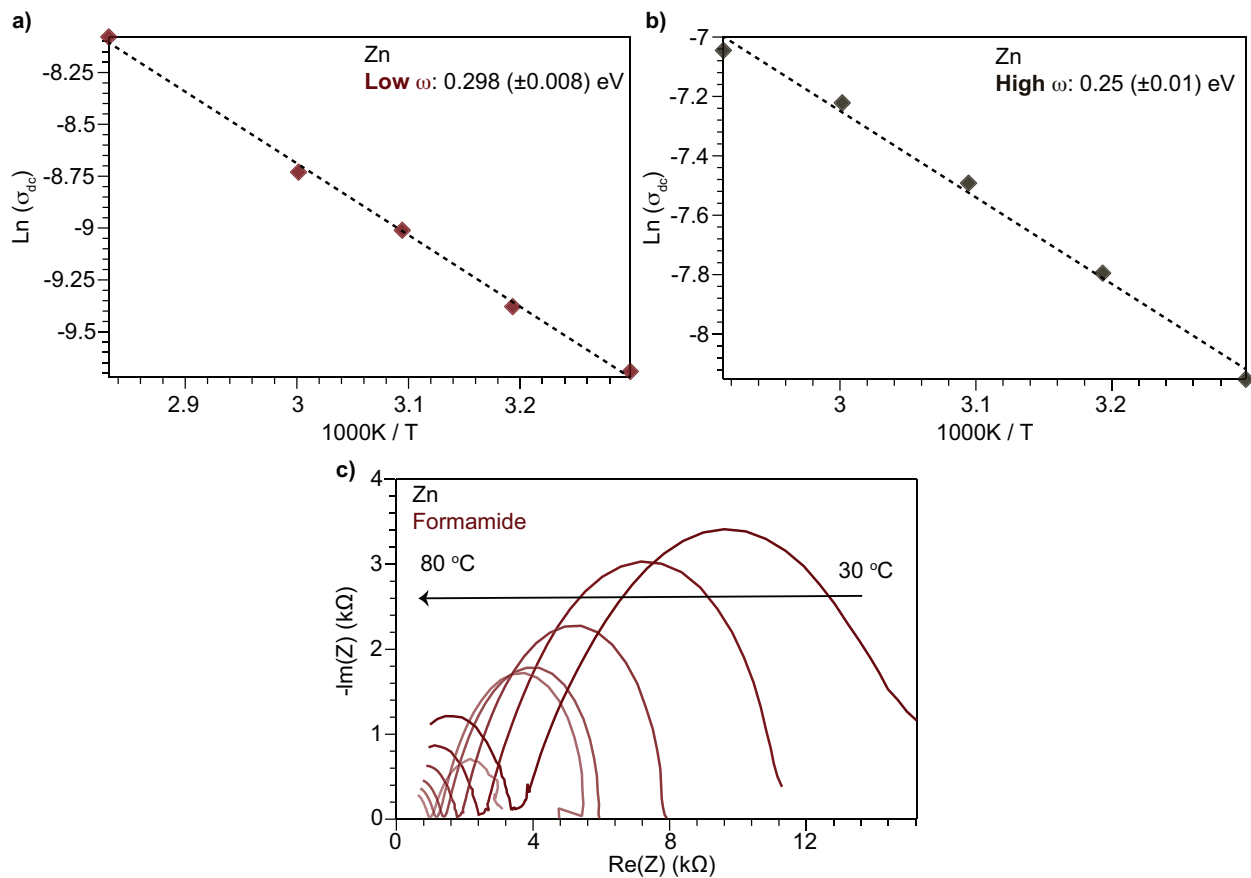

**Figure S13:** Arrhenius plots for the low (a) and high (b) frequency x-intercept resistances from temperature-dependent EIS performed on pressed pellets of  $\text{TMA}_2\text{ZnGe}_4\text{S}_{10}$  after formamide treatment (c).

| Solvent           | Circuit Element       | Fitted Value                    | Error (%)     | Solvent      | Circuit Element       | Fitted Value                    | Error (%)    |
|-------------------|-----------------------|---------------------------------|---------------|--------------|-----------------------|---------------------------------|--------------|
| <i>n-propanol</i> | Bulk Q<br>n           | 0.039 nS.S <sup>n</sup>         | 1.16          | <i>Water</i> | Bulk Q<br>n           | 0.074 nS.S <sup>n</sup><br>1    | 7.99<br>0.48 |
|                   | Chemical Q<br>n       | 19 μS.S <sup>n</sup><br>0.31    | 3.65<br>4.24  |              | Chemical Q<br>n       | 77 μS.S <sup>n</sup><br>0.4     | 2.31<br>1.45 |
|                   | Ionic Resistance      | 87 kΩ                           | 2.54          |              | Ionic Resistance      | 1.3 kΩ                          | 1.39         |
|                   | Electronic Resistance | 395 kΩ                          | 2.54          |              | Electronic Resistance | N/A                             | N/A          |
|                   | Coupling Q<br>n       | 0.12 μS.S <sup>n</sup><br>0.3   | 3.5<br>0.96   |              | Coupling Q<br>n       | 33 μS.S <sup>n</sup><br>0.15    | 4.3<br>3.17  |
| <i>IPA</i>        | Bulk Q<br>n           | 0.025 nS.S <sup>n</sup><br>0.99 | 1.32<br>0.089 | <i>DCM</i>   | Contact Resistance    | 200 Ω                           | 0.4          |
|                   | Chemical Q<br>n       | 16 μS.S <sup>n</sup><br>0.27    | 4.74<br>5.95  |              | Bulk Q<br>n           | 0.042 nS.S <sup>n</sup><br>0.96 | 1.16<br>0.08 |
|                   | Ionic Resistance      | 132 kΩ                          | 0.84          |              | Chemical Q<br>n       | N/A<br>N/A                      | N/A<br>N/A   |
|                   | Electronic Resistance | 0.092 MΩ                        | 4.63          |              | Ionic Resistance      | N/A                             | N/A          |
|                   | Coupling Q<br>n       | 27 nS.S <sup>n</sup><br>0.37    | 5.2<br>1.09   |              | Electronic Resistance | 449 kΩ                          | 0.86         |
| <i>MeOH</i>       | Bulk Q<br>n           | 0.063 nS.S <sup>n</sup><br>0.95 | 2.07<br>0.14  | <i>Dry</i>   | Coupling Q<br>n       | 8.2 nS.S <sup>n</sup><br>0.29   | 2.6<br>0.86  |
|                   | Chemical Q<br>n       | 39 μS.S <sup>n</sup><br>0.32    | 5.74<br>6.5   |              | Bulk Q<br>n           | 0.036 nS.S <sup>n</sup><br>0.97 | 1.3<br>0.09  |
|                   | Ionic Resistance      | 42 kΩ                           | 1.16          |              | Chemical Q<br>n       | N/A<br>N/A                      | N/A<br>N/A   |
|                   | Electronic Resistance | 145 kΩ                          | 3.07          |              | Ionic Resistance      | N/A                             | N/A          |
|                   | Coupling Q<br>n       | 0.35 μS.S <sup>n</sup><br>0.3   | 3.5<br>0.9    |              | Electronic Resistance | 1.13 MΩ                         | 0.93         |
| <i>EtOH</i>       | Bulk Q<br>n           | 0.032 nS.S <sup>n</sup><br>0.97 | 2.15<br>0.14  |              | Coupling Q<br>n       | 7.8 nS.S <sup>n</sup><br>0.37   | 6.5<br>1.7   |
|                   | Chemical Q<br>n       | 12 μS.S <sup>n</sup><br>0.25    | 2.23<br>2.22  |              |                       |                                 |              |
|                   | Ionic Resistance      | 44 kΩ                           | 1.12          |              |                       |                                 |              |
|                   | Electronic Resistance | 240 kΩ                          | 2.7           |              |                       |                                 |              |
|                   | Coupling Q<br>n       | 11 nS.S <sup>n</sup><br>0.54    | 2.97<br>0.38  |              |                       |                                 |              |

**Table S1:** Equivalent circuit fit parameters and their associated percent error for pressed pellet EIS performed on TMA<sub>2</sub>FeGe<sub>4</sub>S<sub>10</sub>.

| Solvent               | Circuit Element       | Fitted Value            | Error (%)        | Solvent               | Circuit Element        | Fitted Value            | Error (%) |
|-----------------------|-----------------------|-------------------------|------------------|-----------------------|------------------------|-------------------------|-----------|
| <i>n-propanol</i>     | Bulk Q                | 0.022 nS.S <sup>n</sup> | 1.69             | <i>DCM</i>            | Bulk Q                 | 0.030 nS.S <sup>n</sup> | 2.5       |
|                       | n                     | 1                       | 0.12             |                       | n                      | 0.98                    | 0.18      |
|                       | Chemical Q            | 3.2 μS.S <sup>n</sup>   | 4.7              |                       | Chemical Q             | N/A                     | N/A       |
|                       | n                     | 0.6                     | 3.97             |                       | n                      | N/A                     | N/A       |
|                       | Ionic Resistance      | 373 kΩ                  | 1.12             |                       | Ionic Resistance       | 3.1 MΩ                  | 3.3       |
| <i>IPA</i>            | Electronic Resistance | 3.22 MΩ                 | 8.1              | Electronic Resistance | N/A                    | N/A                     |           |
|                       | Coupling Q            | 8.4 nS.S <sup>n</sup>   | 3.89             | Coupling Q            | 4.3 nS.S <sup>n</sup>  | 6.7                     |           |
|                       | n                     | 0.48                    | 0.66             | n                     | 0.45                   | 1.5                     |           |
|                       | Bulk Q                | 0.022 nS.S <sup>n</sup> | 1.23             | <i>Water</i>          | Bulk Q                 | 0.051 nS.S <sup>n</sup> | 5.75      |
|                       | n                     | 1                       | 0.09             |                       | n                      | 1                       | 0.35      |
| Chemical Q            | 2.4 μS.S <sup>n</sup> | 4.29                    | Chemical Q       |                       | 20 μS.S <sup>n</sup>   | 1.4                     |           |
| n                     | 0.52                  | 4.2                     | n                |                       | 0.71                   | 0.46                    |           |
| Ionic Resistance      | 686 kΩ                | 0.91                    | Ionic Resistance |                       | 1.1 kΩ                 | 0.74                    |           |
| <i>MeOH</i>           | Electronic Resistance | 5.93 MΩ                 | 6.7              | Electronic Resistance | 9.6 kΩ                 | 0.97                    |           |
|                       | Coupling Q            | 2.2 nS.S <sup>n</sup>   | 4.1              | Coupling Q            | 0.46 μS.S <sup>n</sup> | 5.9                     |           |
|                       | n                     | 0.55                    | 0.6              | n                     | 0.41                   | 0.93                    |           |
|                       | Bulk Q                | 0.031 nS.S <sup>n</sup> | 3.2              | Contact Resistance    | 150 Ω                  | 3.6                     |           |
|                       | n                     | 0.98                    | 0.21             | <i>w/ TMABr</i>       | Bulk Q                 | N/A                     | N/A       |
| Chemical Q            | 7 μS.S <sup>n</sup>   | 3.53                    | n                |                       | N/A                    | N/A                     |           |
| n                     | 0.62                  | 2.6                     | Chemical Q       |                       | 31 μS.S <sup>n</sup>   | 1                       |           |
| Ionic Resistance      | 55 kΩ                 | 1.39                    | n                |                       | 0.7                    | 0.3                     |           |
| Electronic Resistance | 1.03 MΩ               | 5.2                     | Ionic Resistance |                       | 180 Ω                  | 1.02                    |           |
| <i>EtOH</i>           | Coupling Q            | 22 nS.S <sup>n</sup>    | 5.7              | Electronic Resistance | 8.2 kΩ                 | 0.93                    |           |
|                       | n                     | 0.48                    | 0.84             | Coupling Q            | 0.32 μS.S <sup>n</sup> | 10.8                    |           |
|                       | Bulk Q                | 0.021 nS.S <sup>n</sup> | 2.35             | n                     | 0.5                    | 1.3                     |           |
|                       | n                     | 1                       | 0.16             | <i>Dry</i>            | Bulk Q                 | 0.028 nS.S <sup>n</sup> | 5.6       |
|                       | Chemical Q            | 3 μS.S <sup>n</sup>     | 3.6              |                       | n                      | 1                       | 0.8       |
| n                     | 0.56                  | 2.96                    | Chemical Q       |                       | 0.13 μS.S <sup>n</sup> | 2                       |           |
| Ionic Resistance      | 193 kΩ                | 1.3                     | n                |                       | 0.4                    | 2.4                     |           |
| Electronic Resistance | 1.84 MΩ               | 3.75                    | Ionic Resistance |                       | 40 MΩ                  | 0.37                    |           |
|                       | Coupling Q            | 11 nS.S <sup>n</sup>    | 3.99             | Electronic Resistance | N/A                    | N/A                     |           |
|                       | n                     | 0.5                     | 0.62             | Coupling Q            | 2.8 nS.S <sup>n</sup>  | 6.7                     |           |
|                       |                       |                         |                  | n                     | 0.48                   | 0.44                    |           |

**Table S2:** Equivalent circuit fit parameters and their associated percent error for pressed pellet EIS performed on TMA<sub>2</sub>FeGe<sub>4</sub>S<sub>10</sub>.



## Temperature Dependent DC Conductivity

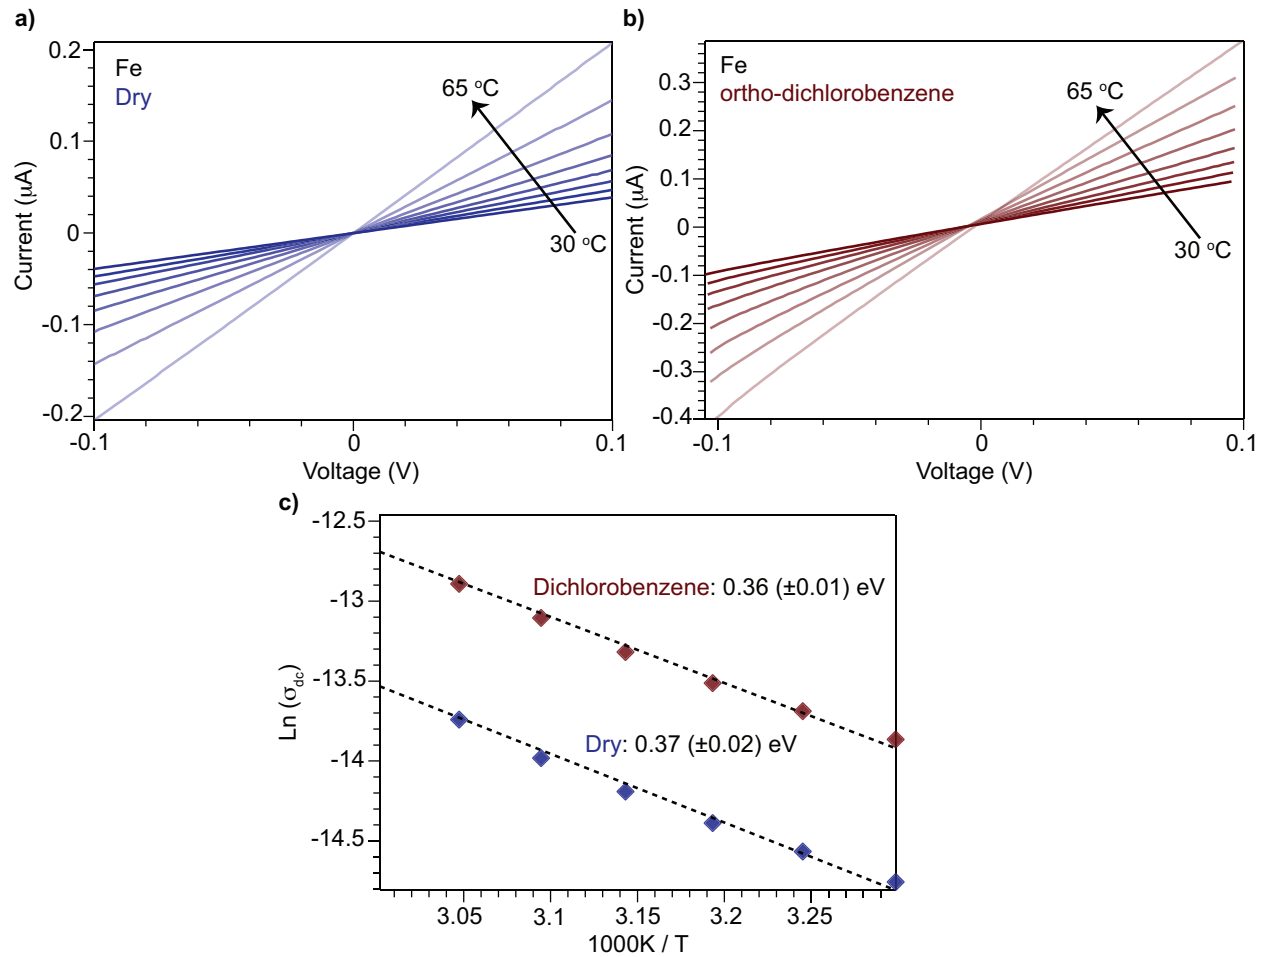

**Figure S14:**  $I$ - $V$  curves for pressed pellets of TMA<sub>2</sub>FeGe<sub>4</sub>S<sub>10</sub> scanned at 2mV/s from 30 - 65 °C before (a) and after (b) the addition of ortho-dichlorobenzene. Arrhenius fits (dotted traces) provide electronic conduction activation barriers for dry (blue) and ortho-dichlorobenzene (red).

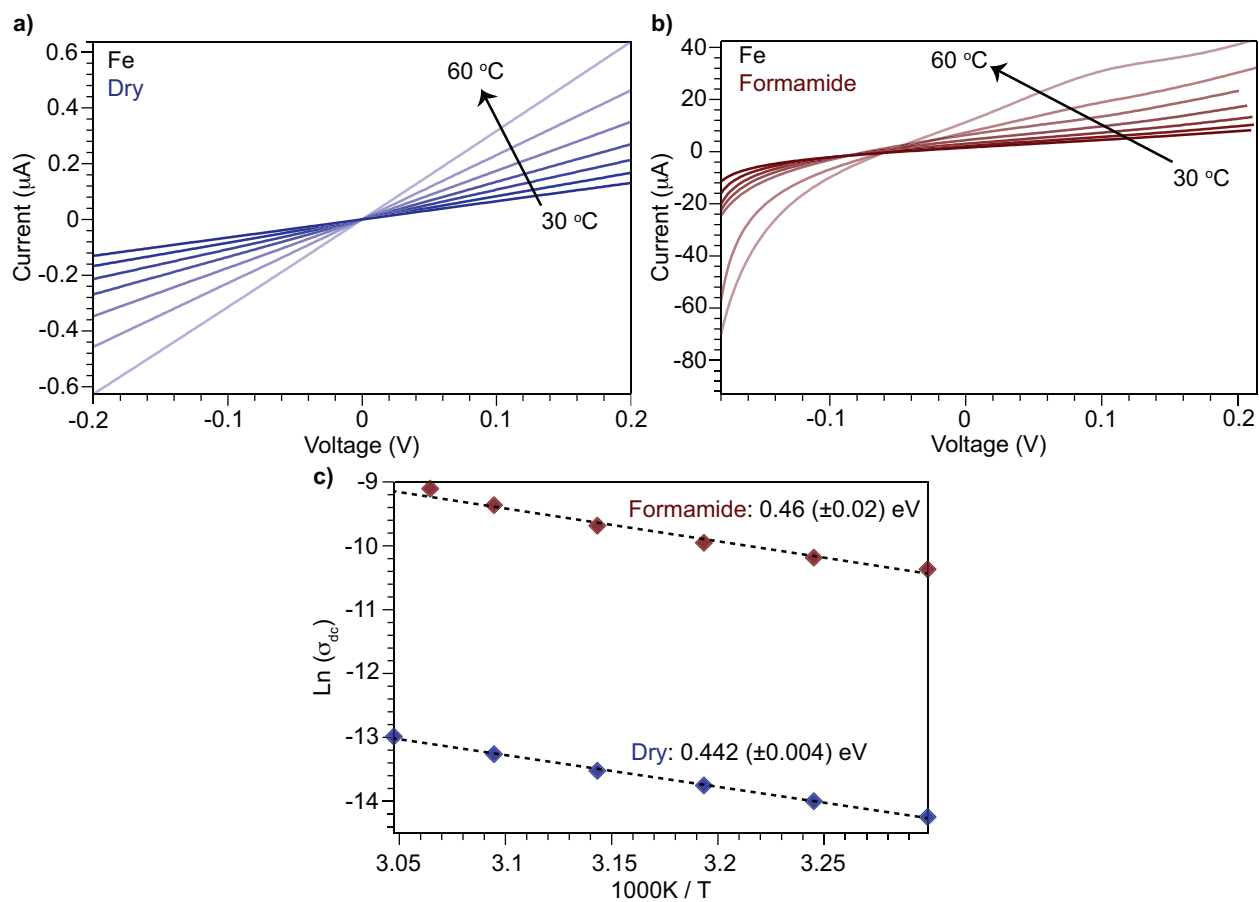

**Figure S15:**  $I$ - $V$  curves for pressed pellets of TMA<sub>2</sub>FeGe<sub>4</sub>S<sub>10</sub> scanned at 2mV/s from 30 - 65 °C before (a) and after (b) the addition of formamide. Arrhenius fits (dotted traces) provide electronic conduction activation barriers for dry (blue) and or (red).

## References

- (1) McKenzie, J.; Le, K. N.; Bardgett, D. J.; Collins, K. A.; Ericson, T.; Wojnar, M. K.; Chouinard, J.; Gollidge, S.; Cozzolino, A. F.; Johnson, D. C.; Hendon, C. H.; Brozek, C. K. "Conductivity in Open-Framework Chalcogenides Tuned via Band Engineering and Redox Chemistry." *Chem. Mater.* **2022**, *34* (4), 1905–1920.  
<https://doi.org/10.1021/acs.chemmater.1c04285>.
- (2) Bowes, C. L.; Lough, A. J.; Malek, A.; Ozin, G. A.; Petrov, S.; Young, D. "Thermally Stable Self-Assembling Open-Frameworks: Isostructural Cs<sup>+</sup> and (CH<sub>3</sub>)<sub>4</sub>N<sup>+</sup> Iron Germanium Sulfides." *Chem. Ber.* **1996**, *129* (3), 283–287.  
<https://doi.org/10.1002/cber.19961290307>.
- (3) Bondarenko A. S., Ragoisha G. A. *EIS Spectrum Analyser*; In Progress in Chemometrics Research, Pomerantsev A. L., Ed.; Nova Science Publishers: New York, 2005.
